# Supplementary material
Source: publisher figshare collection journal article supplement (https://tandf.figshare.com/articles/dataset/_/5280019)
Supplement: Supplementary file 1 [file 2]

Archive with 3 entries (3 files):
- Data_and_Code_for_Real_Data_Analyses.zip
- UASA_A_1356316_Supplement.pdf
- Zhou_Hanson_ACS_author_form.pdf
