# Supplementary material
Source: publisher figshare collection journal article supplement (https://tandf.figshare.com/articles/dataset/_/5280019)
Supplement: Supplementary file 1 [file 2 › Zhou_Hanson_ACS_author_form.pdf]

## **JASA ACS Reproducibility Initiative - Author Contributions Checklist Form**

The purpose of the Author Contributions Checklist (ACC) Form is to document the code and data supporting a manuscript, and describe how to reproduce its main results.

As of Sept. 1, 2016, the ACC Form must be included with all new submissions to JASA ACS.

This document is the initial version of the template that will be provided to authors. The JASA Associate Editors for Reproducibility will update this document with more detailed instructions and information about best practices for many of the listed requirements over time.

### **Data**

#### **Abstract (Mandatory)**

A zip file “Data and Code for Real Data Analyses” has been submitted with the manuscript. Three data sets are analyzed: (1) Loblolly Pine Survival Data, (2) Oral Health Data from the Signal Tandmobiel Study, and (3) Leukemia Survival Data in Northwest England.

#### **Availability (Mandatory)**

All data are publicly available for direct downloading. For the ease of review process, all datasets have been provided in the zip file.

#### **Description (Mandatory if data available)**

Data (1): available at <http://dx.doi.org/10.1080/01621459.2014.995793>.

Data (2): available in the R package “bayesSurv”.

Data (3): available in the provided R package accompanying the submitted paper.

### **Code**

#### **Abstract (Mandatory)**

A zip file “Data and Code for Real Data Analyses” has been submitted with the manuscript. It contains all code for reproducing the manuscript results.

#### **Description (Mandatory)**

The zip file contains three folders: “Loblolly Pine Survival Data”, “The Signal Tandmobiel Study”, and “Leukemia Data”. In each folder, there is a README.txt file containing the information about the data and code.

### **Instructions for Use**

#### **Reproducibility (Mandatory)**

All tables and figures from the paper can be reproduced up to MCMC errors.

To reproduce, one just needs to carefully run the provided R code with appropriate settings as suggested in the paper.

**Replication (Optional)**

How to use software in other settings (or links to such information, e.g., R package vignettes, demos or other examples)

**Notes**

Other relevant information, in particular how to access the data and code if not yet made publicly available.
